# Supplementary material for: Cross-scale electric manipulations of cells and droplets by frequency-modulated dielectrophoresis and electrowetting
Source: Royal Society of Chemistry journal article supplement (doi:10.1039/b803204a), 2008-01-01
Supplement: b803204a.pdf [file b803204a.pdf]

## Electronic Supplementary Information

Derivations of curves in Fig. 6

### ■ Curve **A**:

Although the two shell model<sup>26</sup> can be used to calculate  $\text{Re}(f_{CM})$  of cells in this study, the single shell model<sup>26,27</sup> simplifies the calculation and brings a similar result. In this model,  $f_{CM}$  is expressed as:

$$f_{CM} = \frac{\varepsilon_{cell}^* - \varepsilon_m^*}{\varepsilon_{cell}^* + 2\varepsilon_m^*}, \quad (\text{supplementary-a})$$

$$\varepsilon_{cell}^* = \frac{\left(\frac{d_c}{d_{cp}}\right)^3 + 2\left(\frac{\varepsilon_{cp}^* - \varepsilon_m^*}{\varepsilon_{cp}^* + 2\varepsilon_m^*}\right)}{\left(\frac{d_c}{d_{cp}}\right)^3 - \left(\frac{\varepsilon_{cp}^* - \varepsilon_m^*}{\varepsilon_{cp}^* + 2\varepsilon_m^*}\right)}, \quad (\text{supplementary-b})$$

where  $d_c$  and  $d_{cp}$  are the diameters of the cell and the cytoplasm,  $\varepsilon_m^*$  and  $\varepsilon_{cp}^*$  are the complex permittivities of cell membrane and cytoplasm.

$$\varepsilon_{p,m}^* = \varepsilon_0 \varepsilon_{p,m} - j \frac{\sigma_{p,m}}{2\pi f} \quad (6)$$

### ■ Curve **B**:

$V_L/V$  of cell medium is calculated from:

$$V_L/V = \text{Re}\left(\frac{j2\pi f C_D R_L}{1 + j2\pi f (C_D + C_L) R_L}\right). \quad (4)$$

where  $C_D = \varepsilon_0 \varepsilon_D A/t$ ,  $C_L = \varepsilon_0 \varepsilon_L A/d$ ,  $R_L = \sigma_L d/A$ ;  $\varepsilon_D$  and  $t$  are the dielectric constant and the thickness of SU-8,  $\varepsilon_L$ ,  $\sigma_L$ , and  $d$  are the dielectric constant, conductivity, and thickness of cell medium.

■ Curve **C**:

$V_L/V$  of water can be calculated as curve **B** by substituting  $\epsilon_L$  and  $\sigma_L$  of water.

■ Curve **D**:

$\text{Re}(f_{CM})$  of beads is calculated from eqn (6) and (7).

$$f_{CM} = \frac{\epsilon_p^* - \epsilon_m^*}{\epsilon_p^* + 2\epsilon_m^*} \quad (7)$$

$$\epsilon_{p,m}^* = \epsilon_0 \epsilon_{p,m} - j \frac{\sigma_{p,m}}{2\pi f} \quad (6)$$

■ Curve **E**:

Modified  $\text{Re}(f_{CM})$  is obtained by dividing curve **D** by 400 to shift the cross-over frequency from 2 MHz to 5 kHz.

■ Weighted  $\text{Re}(f_{CM})$  of cells is the product of curve **A** and **B**.

■ Weighted  $\text{Re}(f_{CM})$  of beads is the product of curve **C** and **E**.

The related parameters are listed below:

|                           | Material  | Relative permittivity | Conductivity (S/m)    | Dimension ( $\mu\text{m}$ )   |
|---------------------------|-----------|-----------------------|-----------------------|-------------------------------|
| Polystyrene bead solution | Medium    | 80                    | $1 \times 10^{-4}$    | Thickness: 200                |
|                           | Bead      | 2.5                   | $1.45 \times 10^{-2}$ | Diameter: 5                   |
| Neuro-2a solution         | Medium    | 78                    | $4.8 \times 10^{-2}$  | Thickness: 200                |
|                           | Membrane  | 10                    | $1 \times 10^{-8}$    | Thickness: $5 \times 10^{-3}$ |
|                           | Cytoplasm | 60                    | $5 \times 10^{-1}$    | Diameter: 5                   |
| Dielectric                | SU8       | 3                     | —                     | Thickness: 5                  |

Video 1: The video for Fig. 4, which is played at an 8x speed.

Video 2: The video for Fig. 5, which is played at a 2x speed.
